# Supplementary material for: Metadherin/Astrocyte elevated gene-1 positively regulates the stability and function of forkhead box M1 during tumorigenesis
Source: Oxford University Press journal article supplement (doi:10.1093/neuonc/now229), 2016-09-29
Supplement: now229_suppl_Supplement_Figure_4.doc [file now229_suppl_Supplement_Figure_4.doc]

Supplement Figure 4

# INCLUDEPICTURE "C:\\Users\\fanting\\Desktop\\old data\\old data\\d drive\\Poonam\\may\\Peptide Summary Report (BHU-3-LCMS)_files\\88x31_logo_white.gif" \* MERGEFORMATINET INCLUDEPICTURE "C:\\Users\\fanting\\Desktop\\old data\\old data\\d drive\\Poonam\\may\\Peptide Summary Report (BHU-3-LCMS)_files\\88x31_logo_white.gif" \* MERGEFORMATINET INCLUDEPICTURE "C:\\Users\\fanting\\Desktop\\old data\\old data\\d drive\\Poonam\\may\\Peptide Summary Report (BHU-3-LCMS)_files\\88x31_logo_white.gif" \* MERGEFORMATINET INCLUDEPICTURE "../old%20data/old%20data/d%20drive/Poonam/may/Peptide%20Summary%20Report%20(BHU-3-LCMS)_files/88x31_logo_white.gif" \* MERGEFORMAT
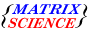
 Mascot Search Results

**MS/MS Fragmentation of TLPPATSTEPSVILSK**

**Found in gi|62529090, LYRIC [Homo sapiens]**

**Match to Query 1209: 1640.322418 from (821.168600, 2+)**

**Title: 090809sh7.808.808.2.dta**

**Data file C:\Xcalibur\data\09Q3\090809sh7.RAW**

**Click mouse within plot area to zoom in by factor of two about that point**

**Or, Plot from 200 to 1700 Da Full range**


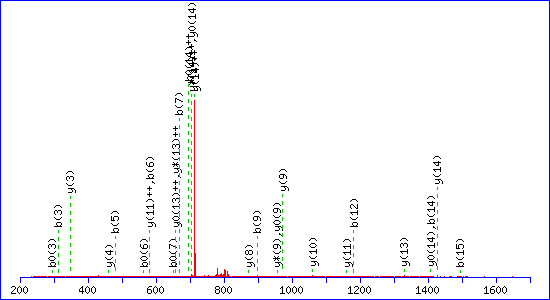


**Average mass of neutral peptide Mr(calc): 1640.87**

**Ions Score: 60**

**Expect: 0.0032**

**Matches (Bold Red): 30/148 fragment ions using 75 most intense peaks**

| **#** | **b** | **b++** | **b0** | **b0++** | **Seq.** |
| --- | --- | --- | --- | --- | --- |
| **1** | 102.11 | 51.56 | 84.10 | 42.55 | **T** |
| **2** | 215.27 | 108.14 | 197.25 | 99.13 | **L** |
| **3** | **312.38** | 156.70 | **294.37** | 147.69 | **P** |
| **4** | 409.50 | 205.25 | 391.48 | 196.25 | **P** |
| **5** | **480.58** | 240.79 | 462.56 | 231.78 | **A** |
| **6** | **581.68** | 291.34 | **563.67** | 282.34 | **T** |
| **7** | **668.76** | 334.88 | **650.74** | 325.88 | **S** |
| **8** | 769.86 | 385.43 | 751.85 | 376.43 | **T** |
| **9** | **898.98** | 449.99 | 880.96 | 440.98 | **E** |
| **10** | 996.09 | 498.55 | 978.08 | 489.54 | **P** |
| **11** | 1083.17 | 542.09 | 1065.15 | 533.08 | **S** |
| **12** | **1182.30** | 591.65 | 1164.28 | 582.65 | **V** |
| **13** | 1295.46 | 648.23 | 1277.44 | 639.22 | **I** |
| **14** | **1408.62** | **704.81** | 1390.60 | **695.80** | **L** |
| **15** | **1495.69** | 748.35 | 1477.68 | 739.34 | **S** |
| **16** |  |  |  |  | **K** |

| **#** | **y** | **y++** | **y*** | **Y*++** | **y0** | **y0++** | **Seq.** |
| --- | --- | --- | --- | --- | --- | --- | --- |
| **16** |  |  |  |  |  |  | **T** |
| **15** | 1540.78 | 770.89 | 1523.75 | 762.38 | 1522.76 | 761.88 | **L** |
| **14** | **1427.62** | **714.31** | 1410.59 | **705.80** | **1409.60** | **705.31** | **P** |
| **13** | **1330.50** | 665.76 | 1313.47 | **657.24** | 1312.49 | **656.75** | **P** |
| **12** | 1233.39 | 617.20 | 1216.36 | 608.68 | 1215.37 | 608.19 | **A** |
| **11** | **1162.31** | **581.66** | 1145.28 | 573.14 | 1144.29 | 572.65 | **T** |
| **10** | **1061.21** | 531.11 | 1044.18 | 522.59 | 1043.19 | 522.10 | **S** |
| **9** | **974.13** | 487.57 | **957.10** | 479.05 | **956.11** | 478.56 | **T** |
| **8** | **873.03** | 437.02 | 855.99 | 428.50 | 855.01 | 428.01 | **E** |
| **7** | 743.91 | 372.46 | 726.88 | 363.94 | 725.90 | 363.45 | **P** |
| **6** | 646.80 | 323.90 | 629.77 | 315.39 | 628.78 | 314.89 | **S** |
| **5** | 559.72 | 280.36 | 542.69 | 271.85 | 541.70 | 271.36 | **V** |
| **4** | 460.59 | 230.80 | 443.56 | 222.28 | 442.57 | 221.79 | **I** |
| **3** | 347.43 | 174.22 | 330.40 | 165.70 | 329.41 | 165.21 | **L** |
| **2** | 234.27 | 117.64 | 217.24 | 109.12 | 216.26 | 108.63 | **S** |
| **1** | 147.19 | 74.10 | 130.16 | 65.59 |  |  | **K** |


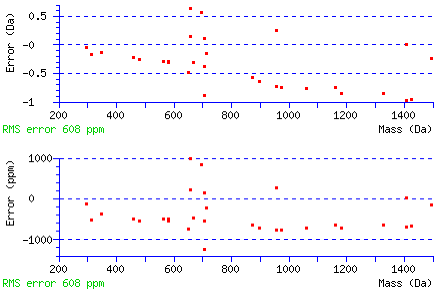


NCBI **BLAST** search of TLPPATSTEPSVILSK

(Parameters: blastp, nr protein database, expect=20000, no filter, PAM30)

Other BLAST web gateways

### All matches to this query

| **Score** | **Mr(calc):** | **Delta** | **Sequence** |
| --- | --- | --- | --- |
| 59.5 | 1640.87 | -0.55 | TLPPATSTEPSVILSK |
| 18.2 | 1638.79 | 1.53 | QXLVTVCESGMQTK |
| 18.1 | 1638.80 | 1.53 | CQDQSPTTLDAFKGK |
| 18.1 | 1639.93 | 0.39 | AVSPTASVMKATWMK |
| 17.2 | 1640.00 | 0.33 | DVMDALILKMAEMK |
| 14.5 | 1642.05 | -1.73 | LVESVMKLCLIMAK |
| 13.9 | 1640.77 | -0.45 | EGMKGQLTEASSATSK |
| 13.5 | 1641.83 | -1.51 | SMGHSQVGMHVFHR |
| 13.3 | 1638.85 | 1.47 | APSACCCSPAALQRR |
| 13.3 | 1638.85 | 1.47 | APSACCCSPAALQRR |

# INCLUDEPICTURE "C:\\Users\\fanting\\Desktop\\old data\\old data\\d drive\\Poonam\\may\\Peptide Summary Report (BHU-3-LCMS)_files\\88x31_logo_white.gif" \* MERGEFORMATINET INCLUDEPICTURE "C:\\Users\\fanting\\Desktop\\old data\\old data\\d drive\\Poonam\\may\\Peptide Summary Report (BHU-3-LCMS)_files\\88x31_logo_white.gif" \* MERGEFORMATINET INCLUDEPICTURE "C:\\Users\\fanting\\Desktop\\old data\\old data\\d drive\\Poonam\\may\\Peptide Summary Report (BHU-3-LCMS)_files\\88x31_logo_white.gif" \* MERGEFORMATINET INCLUDEPICTURE "../old%20data/old%20data/d%20drive/Poonam/may/Peptide%20Summary%20Report%20(BHU-3-LCMS)_files/88x31_logo_white.gif" \* MERGEFORMAT
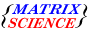
 Mascot Search Results

**MS/MS Fragmentation of SWQDELAQQAEEGSAR**

**Found in gi|62529090, LYRIC [Homo sapiens]**

**Match to Query 1437: 1805.442418 from (903.728600, 2+)**

**Title: 090809sh7.865.865.2.dta**

**Data file C:\Xcalibur\data\09Q3\090809sh7.RAW**

**Click mouse within plot area to zoom in by factor of two about that point**

**Or, Plot from 200 to 1700 Da Full range**


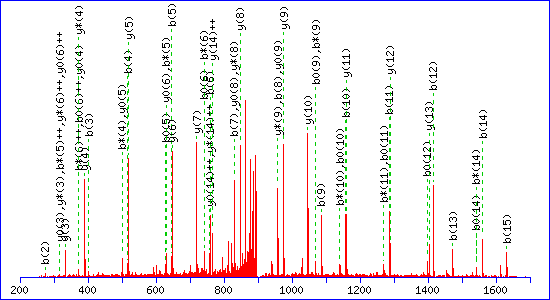


**Average mass of neutral peptide Mr(calc): 1804.83**

**Ions Score: 113**

**Expect: 1.6e-008**

**Matches (Bold Red): 57/172 fragment ions using 87 most intense peaks**

| **#** | **b** | **b++** | **b*** | **b*++** | **b0** | **b0++** | **Seq.** |
| --- | --- | --- | --- | --- | --- | --- | --- |
| **1** | 88.08 | 44.55 |  |  | 70.07 | 35.54 | **S** |
| **2** | **274.29** | 137.65 |  |  | 256.28 | 128.64 | **W** |
| **3** | **402.42** | 201.72 | 385.39 | 193.20 | 384.41 | 192.71 | **Q** |
| **4** | **517.51** | 259.26 | **500.48** | 250.74 | 499.50 | 250.25 | **D** |
| **5** | **646.63** | 323.82 | **629.59** | **315.30** | **628.61** | 314.81 | **E** |
| **6** | **759.78** | 380.40 | **742.75** | **371.88** | **741.77** | 371.39 | **L** |
| **7** | **830.86** | 415.93 | 813.83 | 407.42 | 812.85 | 406.93 | **A** |
| **8** | **958.99** | 480.00 | 941.96 | 471.48 | 940.97 | 470.99 | **Q** |
| **9** | **1087.12** | 544.06 | **1070.09** | 535.55 | **1069.10** | 535.06 | **Q** |
| **10** | **1158.20** | 579.60 | **1141.17** | 571.09 | **1140.18** | 570.59 | **A** |
| **11** | **1287.31** | 644.16 | **1270.28** | 635.64 | **1269.30** | 635.15 | **E** |
| **12** | **1416.42** | 708.72 | 1399.39 | 700.20 | **1398.41** | 699.71 | **E** |
| **13** | **1473.48** | 737.24 | 1456.45 | 728.73 | 1455.46 | 728.23 | **G** |
| **14** | **1560.55** | 780.78 | **1543.52** | 772.27 | **1542.54** | 771.77 | **S** |
| **15** | **1631.63** | 816.32 | 1614.60 | 807.80 | 1613.62 | 807.31 | **A** |
| **16** |  |  |  |  |  |  | **R** |

| **#** | **y** | **y++** | **y*** | **Y*++** | **y0** | **y0++** | **Seq.** |
| --- | --- | --- | --- | --- | --- | --- | --- |
| **16** |  |  |  |  |  |  | **S** |
| **15** | 1718.76 | 859.88 | 1701.72 | 851.37 | 1700.74 | 850.87 | **W** |
| **14** | 1532.55 | **766.78** | 1515.51 | **758.26** | 1514.53 | **757.77** | **Q** |
| **13** | **1404.42** | 702.71 | 1387.39 | 694.20 | 1386.40 | 693.70 | **D** |
| **12** | **1289.33** | 645.17 | 1272.30 | 636.65 | 1271.31 | 636.16 | **E** |
| **11** | **1160.21** | 580.61 | 1143.18 | 572.10 | 1142.20 | 571.60 | **L** |
| **10** | **1047.06** | 524.03 | 1030.03 | 515.52 | 1029.04 | 515.02 | **A** |
| **9** | **975.98** | 488.49 | **958.95** | 479.98 | **957.96** | 479.49 | **Q** |
| **8** | **847.85** | 424.43 | **830.82** | 415.91 | **829.83** | 415.42 | **Q** |
| **7** | **719.72** | 360.36 | 702.69 | 351.85 | 701.71 | 351.36 | **A** |
| **6** | **648.64** | 324.83 | 631.61 | **316.31** | **630.63** | **315.82** | **E** |
| **5** | **519.53** | 260.27 | 502.50 | 251.75 | **501.51** | 251.26 | **E** |
| **4** | **390.41** | 195.71 | **373.38** | 187.20 | **372.40** | 186.70 | **G** |
| **3** | **333.36** | 167.19 | **316.33** | 158.67 | **315.35** | 158.18 | **S** |
| **2** | 246.29 | 123.65 | 229.26 | 115.13 |  |  | **A** |
| **1** | 175.21 | 88.11 | 158.18 | 79.59 |  |  | **R** |


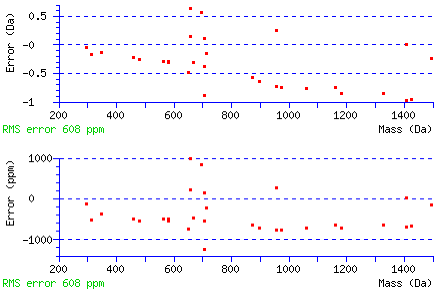


NCBI **BLAST** search of SWQDELAQQAEEGSAR

(Parameters: blastp, nr protein database, expect=20000, no filter, PAM30)

Other BLAST web gateways

### All matches to this query

| **Score** | **Mr(calc):** | **Delta** | **Sequence** |
| --- | --- | --- | --- |
| 112.9 | 1804.83 | 0.62 | SWQDELAQQAEEGSAR |
| 27.2 | 1804.03 | 1.41 | EINAAMALTNLAQGKDK |
| 24.4 | 1804.11 | 1.33 | XAAAAELSLLEKSLGLSK |
| 24.1 | 1805.92 | -0.48 | GGGMSKSQEDALQPGSTR |
| 23.9 | 1803.84 | 1.60 | QLEEAEEEATRANASR |
| 22.7 | 1803.97 | 1.47 | TCCYQALLVDEERGR |
| 22.6 | 1804.91 | 0.54 | KINPTESTSKAEENEK |
| 22.0 | 1803.97 | 1.47 | TCCYQALLVDEERGR |
| 19.9 | 1804.15 | 1.29 | MLPSLSLTVTDLEIKK |
| 19.1 | 1803.99 | 1.45 | MPSAGTTLSERSALQGTP |
