# Supplementary material for: Metadherin/Astrocyte elevated gene-1 positively regulates the stability and function of forkhead box M1 during tumorigenesis
Source: Oxford University Press journal article supplement (doi:10.1093/neuonc/now229), 2016-09-29
Supplement: now229_suppl_Supplementary_Method.doc [file now229_suppl_Supplementary_Method.doc]

**Cell Culture**

NHA cells were cultured in the manufacture’s recommended AGM™ BulletKit™ medium. The glioblastoma and 293T cells were cultured in Dulbecco’s modified eagle medium supplemented with 10% fetal bovine serum (HyClone, Logan, UT). The human glioma stem cell lines were cultured as we described previously4. The last STR authentication of these cells were 08. Nov,2015.

**Lentiviral generation and infection**

For FOXM1 or MTDH stable silencing, the shRNA sequences that target FOXM1 are shFOXM1-1: 5′CTCTTCTCCCTCAGATATA3′ and shFOXM1-2: 5′ GGACCACTTTCCCTACTTT3′; and the shRNA sequences that target MTDH are shMTDH-1: 5′AACAGAAGAAGAAGAACCGGA3′ and shMTDH-2: 5′GAAATCAAAGTCAGATGCTA3′. Lentiviral particles were produced using a lentivirus packaging mix (ViraPower, Life Technologies, Grand Island, NY). For viral transduction, the cells were seeded at 50–60% confluence. The cells were treated overnight with the medium containing lentivirus harvested 48 or 72 hours after transfection. Virus particles were concentrated and purified by ultra-high-speed centrifugation (25 000 g for 2 h at 4°C). Cells were infected with lentivirus in the presence of 6 μg/mL polybrene (Sigma-Aldrich, St. Louis, MO). Selection of stable clones was carried out using puromycin (Sigma-Aldrich, St. Louis, MO).

**Quantitative real-time reverse-transcription PCR and chromatin immunoprecipitation assay**

Q-PCR analysis of *FOXM1*, *MTDH*, vascular endothelial growth factor (*VEGF*), matrix metalloproteinase 2 (*MMP2*), *Skp2*, and *Cdc25B* was performed using total RNA and SYBR green reagent with an ABI Prism 7000HT Sequence Detection System. Chromatin immunoprecipitation (ChIP) assays were performed using a ChIP assay kit (Cell Signaling). The oligonucleotides used for q-PCR and ChIP are described in Supplementary Table 3.

**Cell invasion assay and Matrigel *in vitro* human umbilical vein endothelial cells (HUVECs) tube formation assay**

For the invasion assay, invasion chambers containing polycarbonate filters (8-μm pore size; BD Biosciences,) were coated with growth-factor-reduced Matrigel matrix (50 μg/filter; BD Biosciences). Tumorcells were seeded (2 × 105 cells per chamber) in the upper compartment of each invasion chamber in serum-free medium. The complete medium was placed in the lower compartment and served as a chemoattractant. After 24 hours at 37°C, cells were harvested from the lower compartment and the undersurface of the filter. Each assay was performed on triplicated filters, and the experiments were repeated three times. The harvested cells were counted, and the mean number of cells per chamber was calculated.

For the tube formation assay, the indicated cells were cultured in a serum-free medium for 24 hours. The conditioned media were collected, centrifuged, and transferred to fresh tubes and stored at −20°C. Growth factor–reduced Matrigel matrix (50 μg/filter; BD Biosciences, Bedford, MA) was plated in an eight-well chamber. The chamber was then incubated at 37°C for 30 minutes to allow the Matrigel to polymerize. HUVECs were trypsinized and seeded (5 × 104 cells per well) in each well with 250 μL of conditioned medium. The chamber was incubated for 6 hours. Each well was photographed, and vessel number and length of vessel perimeter in each entire field were calculated using the Scion Image analysis program.

**Immunohistochemistry quantification**

The clinical information for the samples is summarized in Supplementary Table 1. The molecular features are summarized in Supplementary Table 2. We quantitatively scored the tissue sections according to the percentage of positive cells and staining intensity, as previously described: Staining was scored by two investigators blinded to the clinical data using a four-tiered system that incorporated the intensity of immunostaining and the percentage of cells that were positive. The intensity of immunostaining was scored as follows: negative, 0; weak, 1; moderate, 2; intense, 3. For tumors that showed heterogeneous staining, the predominant pattern was taken into account for scoring. The percentage of positive cells was divided into five grades (percentage scores) : <10% (0), 10–25% (1), 26–50% (2), 51–75% (3) and >75% (5). The scores were added and gives a scoring range of 1-8 as shown in Figure 1A.

**Immunoprecipitation (IP)**

Cells were lysed in co-IP buffer (10 mM HEPES [pH 8.0], 300 mM NaCl, 0.1 mM EDTA, 20% glycerol, 0.2% NP-40, protease and phosphatase inhibitors). The lysates were centrifuged and cleared by incubation with 25 μL of Protein A/G gel for 1.5 hours at 4°C. The pre-cleared supernatant was subjected to IP using primary antibodies at 4°C overnight. Then, the protein complexes were collected by incubation with 30 μL of Protein A/G gel for 2 hours at 4°C. The collected protein complexes were washed 6 times with co-IP buffer and analyzed by western blotting.

**MS analyses**

The FLAG-FoxM1 protein complexes were fractionated by SDS-PAGE, followed by silver staining. The silver-stained gel bands were manually cut, destained, and digested with sequencing-grade trypsin (Promega, Madison, WI). The resulting peptides were analyzed by nano-LC-MS/MS with on-line desalting and a FAMOS autosampler. Electrospray ion trap MS was done using an LTQ linear ion trap mass spectrometer (Thermo Finnigan). The fragment spectra were analyzed using the National Center for Biotechnology Information non-redundant protein database via Mascot (Matrix Science) and SEQUEST (Thermo Fisher Scientific).

**Ubiquitination lysis buffer**

The buffer used in ubiquitination assays comprised 50mM HEPES (pH 7.8), 200mM NaCl, 5mM EDTA, 1% NP40, 5% glycerol, 1mM dithiothreitol, protease inhibitor cocktail, and 250 ng mL/1 ubiquitin–aldehyde.

**Antibodies and reagents**

The antibodies against FOXM1 (A-11), VEGF (A-20), MMP-2 (4D3), Skp2 (H-435), Cdc25B (C-20), normal rabbit immunoglobulin G (sc-2345) and normal mouse immunoglobulin G (sc-2025) were obtained from Santa Cruz Biotechnology, Dallas, TX, and the antibodies against MTDH (ab45338), CDH1(ab45990), APC(ab52223), and ubiquitin (ab7780) were from Abcam, Cambridge, MA. The antibodies against α-tubulin (T9026), FLAG (F3165), HA (H6908), GST (G7781), and His (GE27-4710-01) were from Sigma-Aldrich, St. Louis, MO. The fluorescent antibodies Alexa Fluor 488 and Alexa Fluor 596 were from Life Technologies, Grand Island, NY. MG-132 (M7449), ALLN (A6185) and Etoposide (E1383) were from Sigma-Aldrich, St. Louis, MO.

**GST pull-down and *in vitro* binding assay**

6xHis-tagged and GST-tagged proteins were expressed in *E. coli* and purified using a Ni-His purification kit (Novagen, Madison, WI) and GST beads, respectively. For the His pull-down assay, 6xHis-tagged FOXM1 or mutants were mixed with GST-MTDH for 4 hours and then subjected to IP with the indicated primary antibodies at 4°C overnight. Then, the protein complexes were collected by incubation with 30 μL of Protein A/G gel for 2 hours at 4°C. The collected protein complexes were washed 6 times with co-IP buffer and analyzed by western blotting.

**Flow cytometry analysis**

Cells were harvested and fixed in cold ethanol before being stained with propidium iodide (Sigma, 0.45 mg/mL). Resuspended cells were analyzed for DNA content on a fluorescenceactivated cell sorter (FACSVantage), and data were processed using FACS CellQuest software (Becton Dickinson).

**Drug Sensitivity Test**

Cell viability assay shows the cell growth of MTDH stably inhibited U87 and MD11 and their control cells after being treated with 20 μM TMZ for 1 to 5 days. DMSO was used as a treatment control. Colony formation assay of MTDH stably inhibited U87 and MD11 and their control cells after being treated with different concentrations of TMZ for 14 days.

**Bimolecular fluorescence complementation (BiFC) assay**

Wild–type or mutant FOXM1 was cloned into the pBIFC-VN173/Flag vector, and MTDH was cloned into the pBIFC-VC155HA vector. The standard BiFC assay was referred to the article “Design and implementation of bimolecular fluorescence complementation (BiFC) assays for the visualization of protein interactions in living cells.” (Kerppola TK, published in Nat Protoc. 2006;1(3):1278-86.)
