# Supplementary material for: Metadherin/Astrocyte elevated gene-1 positively regulates the stability and function of forkhead box M1 during tumorigenesis
Source: Oxford University Press journal article supplement (doi:10.1093/neuonc/now229), 2016-09-29
Supplement: now229_suppl_Supplementary_Table_1_3.docx [file now229_suppl_Supplementary_Table_1_3.docx]

**Supplementary Table 1**.Clinicopathologic Characteristics of 85 glioma patients

| **Characteristic** | **Value** | **Percentage** |
| --- | --- | --- |
| Total samples (n) | 85 |  |
| Sex(n) |  |  |
| Male | 47 | 55.3% |
| Female | 38 | 44.7% |
| Median age, years(range) | 47(23-72) |  |
| EBRT dose(Gy) | 60 |  |
| Meidan KPS(range) | 80(40-90) |  |
| Progression-free duration(range) | 8(3-16) |  |

**NOTE:** A summary of the clinical characteristics of the study population. The trial involved 85 specimens.

**Abbreviations:** EBRT, external-beam radiotherapy; KPS, Karnofsky performance status.

**Supplementary Table 2.** Molecular features of the 85 GBM samples

|  | **MTDH high** | **MTDH low** | ***p* value** |
| --- | --- | --- | --- |
| Total samples, n (%) (n=85) | 75 (88) | 10 (12) | <0.001 |
| FOXM1 expression (high/low) | 68/7 | 3/7 | <0.001 |
| VEGF expression (high/low) | 63/12 | 5/5 | <0.001 |
| MMP-2 expression (high/low) | 61/14 | 6/4 | <0.001 |
| skp2 expression (high/low) | 58/17 | 5/5 | <0.05 |
| cdc25B expression (high/low) | 60/15 | 3/7 | <0.05 |
| MGMT promoter methylation  (unmethylated/methylated) | 43/32 | 5/5 | >0.05 |
| IDH mutation (mutation/wild-type) | 39/36 | 4/6 | >0.05 |

**Supplementary Table 3**. PCR primers used in real-time RT-PCR and ChIP assay

| ***FOXM1* forward:**  TGCCCAGCAGTCTCTTACCT | ***FOXM1* reverse:**  CTACCCACCTTCTGGCAGTC |
| --- | --- |
| ***MTDH* forward:**  TGCCTCCTTCACAGACCAA | ***MTDH* reverse:**  TCGGCTGCAGATGAGATAG |
| ***GAPDH* forward:**  AATCCCATCACCATCTTCCA | ***GAPDH* reverse:**  TGGACTCCACGACGTACTCA |
| ***VEGF* promoter forward:**  CCCCTTTCCAAAGCCCATTCC | ***VEGF* promoter reverse:**  CCTTCTCCCCGCTCCAACACCC |
| ***MMP-2* forward:**  AACCAGTCTTGCCCAATTTC | ***MMP-2* reverse:**  CCTTCTGCAAATGTGTAAGCC |
| ***Skp2* promoter forward:**  AAT TAG CCA GGT GTG GTA GCG G | ***Skp2* promoter reverse:**  CAG GCT TCA GTG TAA TGG CAC G |
